# Supplementary material for: Probing nucleus-enriched proteins in single living cells via a subcellular-resolved plasmonic immunosandwich assay
Source: Royal Society of Chemistry journal article supplement (doi:10.1039/d1an00003a), 2021-01-01
Supplement: d1an00003a1.pdf [file d1an00003a1.pdf]

*Supporting information for*

**Probing nucleus-enriched proteins in single living cells via  
subcellular-resolved plasmonic immunosandwich assay**

Jia Liu, Dan Xie and Zhen Liu\*

State Key Laboratory of Analytical Chemistry for Life Science, School of Chemistry  
and Chemical Engineering, Nanjing University, Nanjing 210023, China

\*Corresponding author: [zhenliu@nju.edu.cn](mailto:zhenliu@nju.edu.cn)

**Table of contents**

- Supplementary Data

Fig. S1 to Fig. S5

## SUPPLEMENTARYDATA

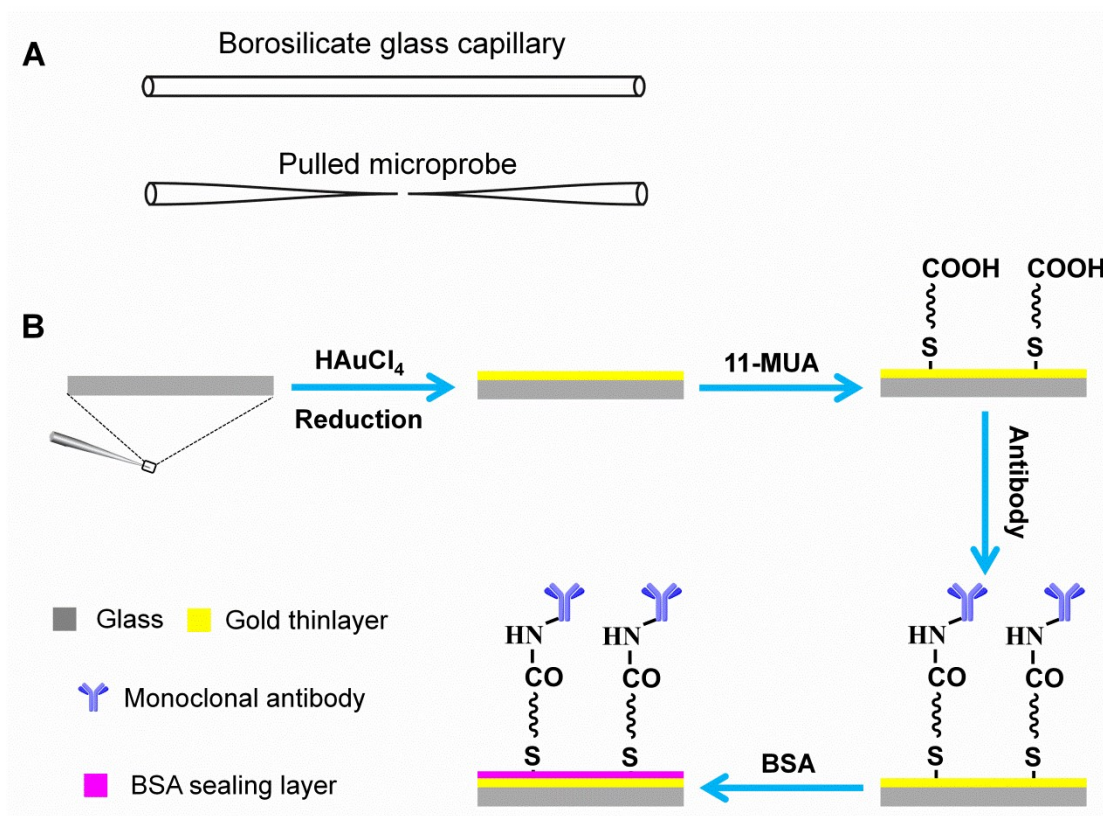

**Fig. S1** Schematic of the procedures for fabrication of extraction microprobes. (A) Preparation of pulled microprobe by a laser-based pipette puller. (B) Fabrication of monoclonal antibody-functionalized gold-based extraction microprobes.

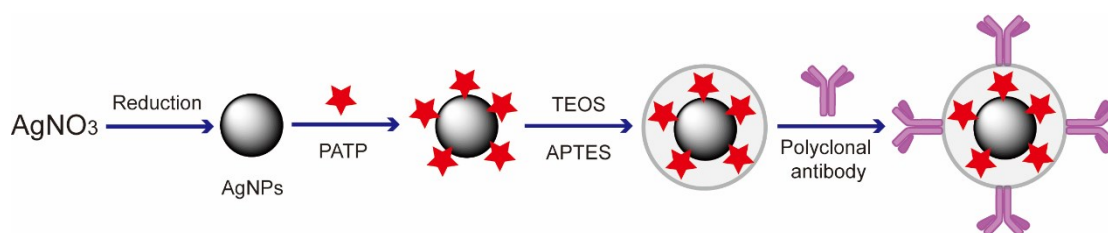

**Fig. S2** The synthesis route of polyclonal antibody-functionalized silver-based plasmonic nanotags.

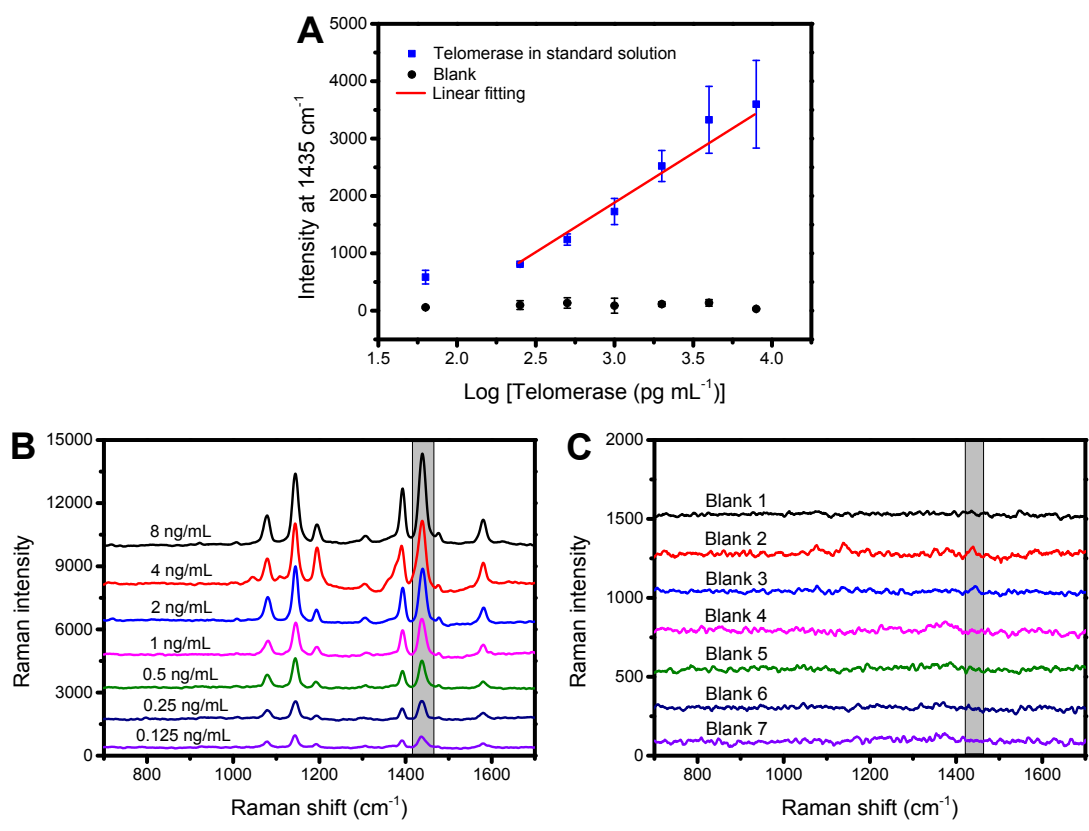

**Fig. S3** Dependence of the Raman intensity at 1435 cm<sup>-1</sup> detected by srPISA with telomerase standard solution. Blank sample: 100 mM phosphate buffer, pH 7.4. Error bars represent standard deviations for three parallel measurements. (B, C) Representative Raman spectra for telomerase detection in standard solutions and blank samples, respectively.

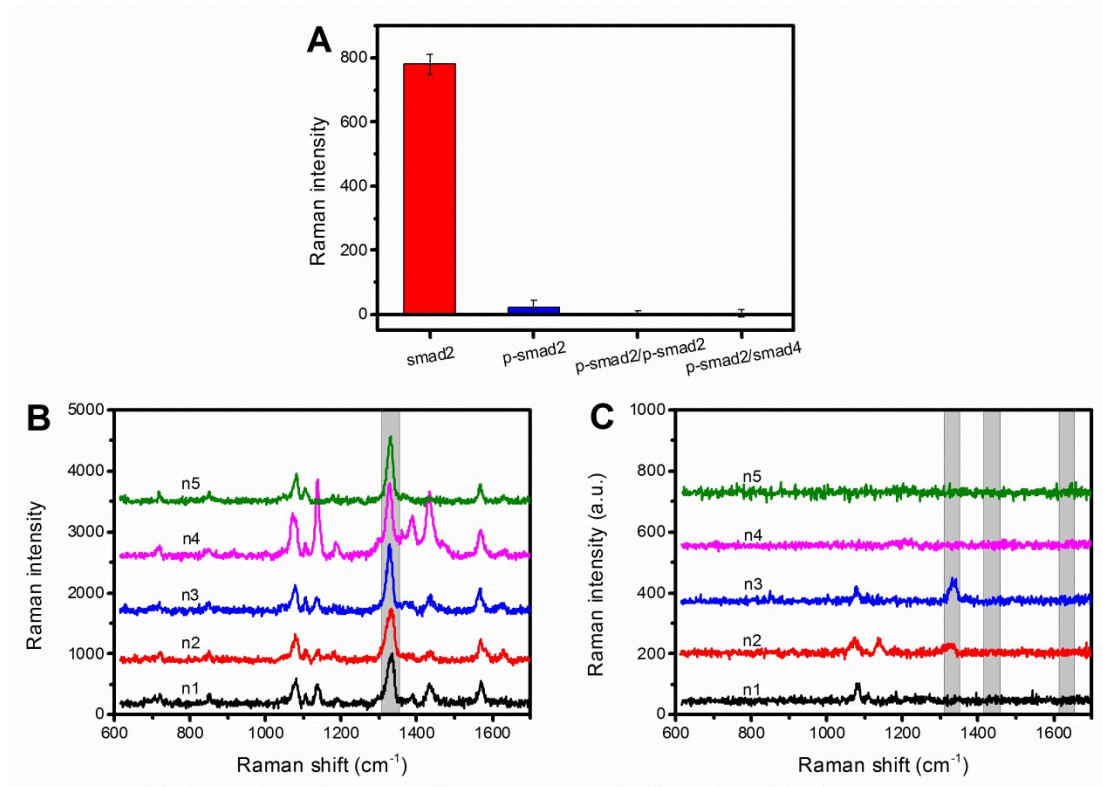

**Fig. S4** Selectivity test of the srPISA approach in single living MCF-7 cells. (A) Raman intensity of target smad2 protein and its similar proteins, including monomeric phospho-smad2 (p-smad2), phospho-smad2 homomeric complexes (p-smad2/p-smad2) and phospho-smad2/sm4 heteromeric complexes (p-smad2/sm4). (B, C) Representative Raman spectra of selectivity test of the srPISA in single living MCF-7 cells for target smad2 protein and its similar proteins.

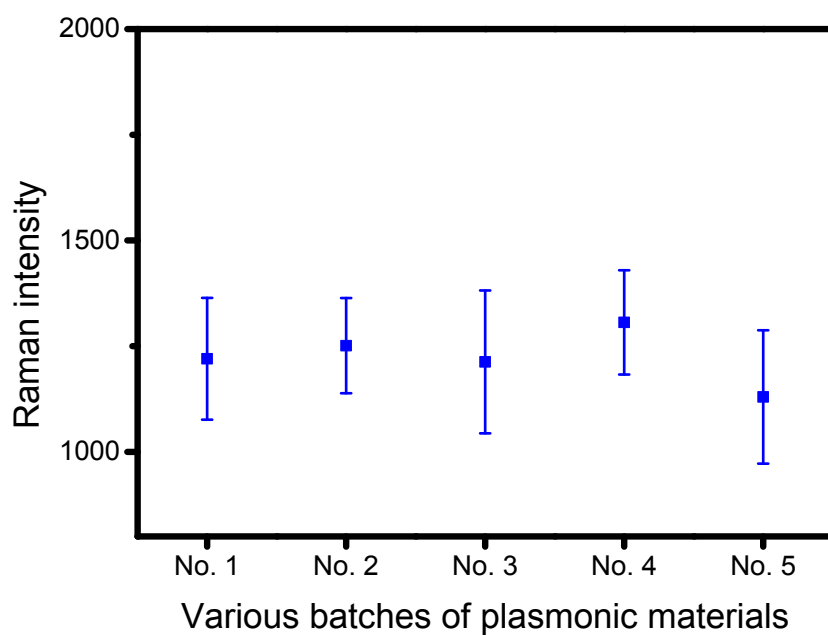

**Fig. S5** Raman intensity variation for various batches of plasmonic materials for detecting telomerase in standard solution. Sample concentration: 500 pg/mL. Error bars represent standard deviations for three parallel measurements.
