# Supplementary figures and images for: Probing nucleus-enriched proteins in single living cells via a subcellular-resolved plasmonic immunosandwich assay
Source: Royal Society of Chemistry journal article supplement (doi:10.1039/d1an00003a), 2021-01-01

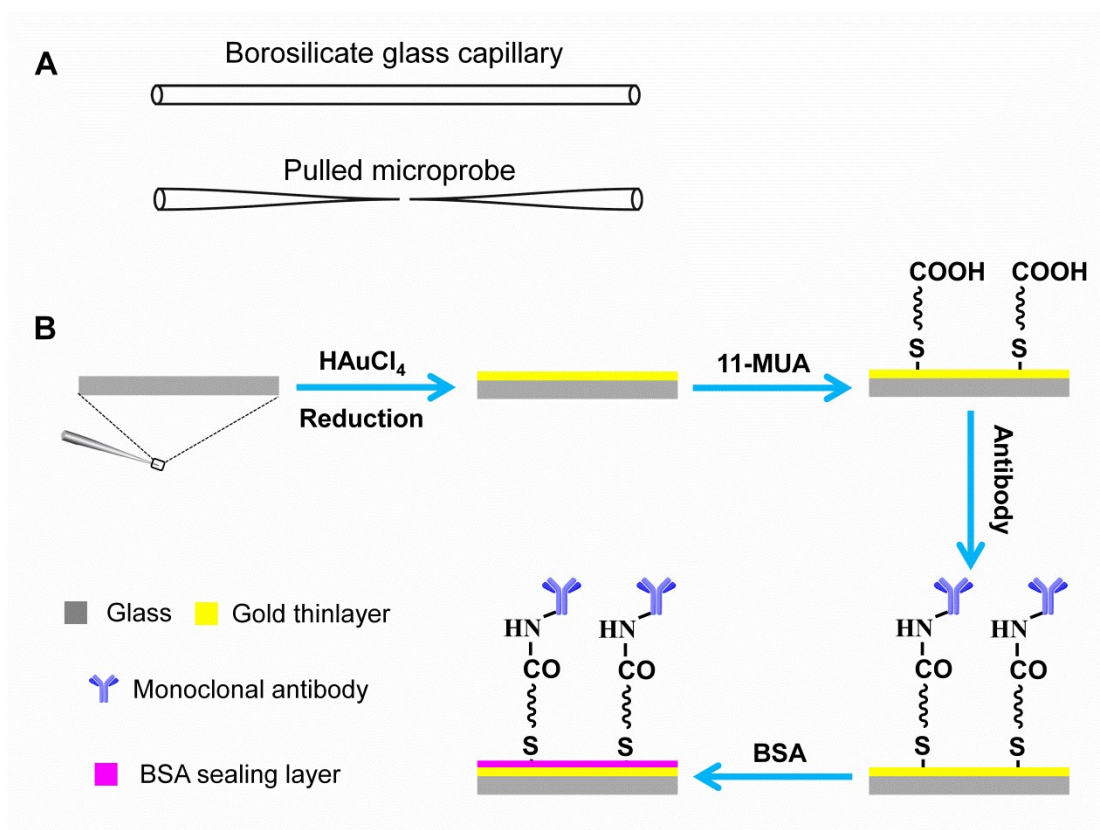

Figure S1

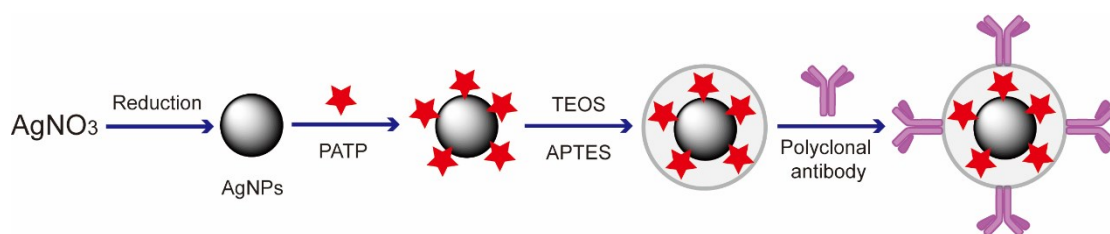

Figure S2

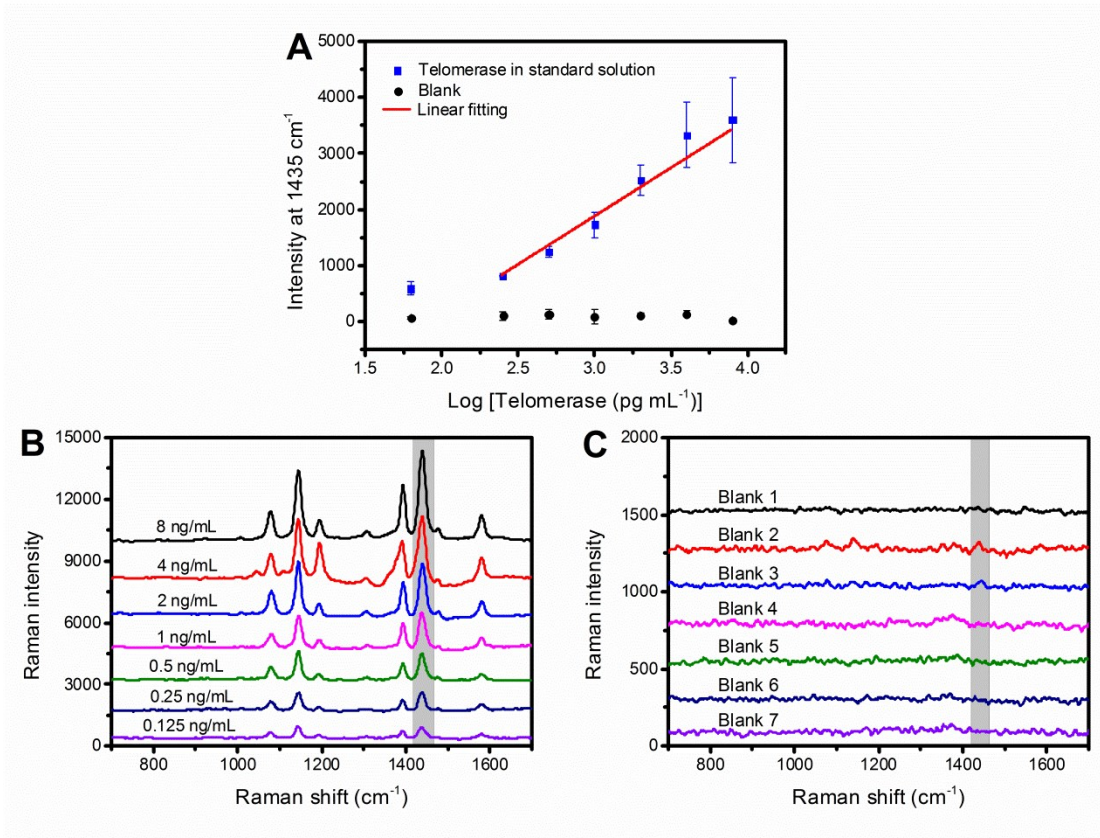

**Figure S3**

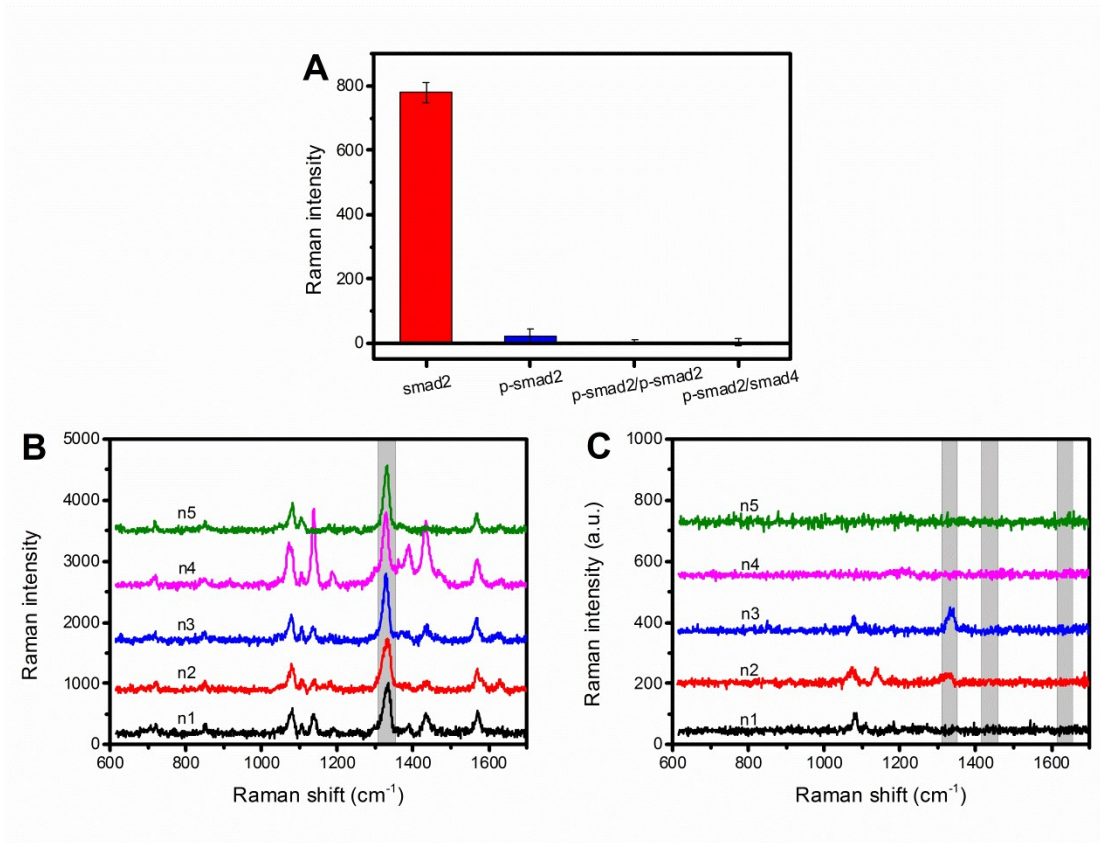

**Figure S4**

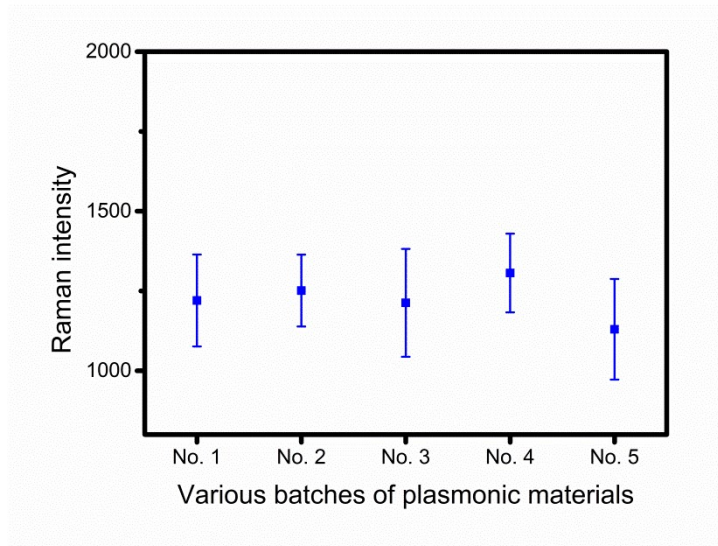

**Figure S5**

Supplement: d1an00003a2.pdf [file d1an00003a2.pdf]
